# Supplementary material
Source: Royal Society of Chemistry journal article supplement (doi:10.1039/d6nr00618c)
Supplement: d6nr00618c1.pdf [file d6nr00618c1.pdf]

## Supporting Information

### Machine Learning Assisted Stability and CO<sub>2</sub> Reduction Reaction

#### Activity Prediction of Single Atom Alloys

Qiuyan Zhu, Dongxu Tian\*, Xiaru Du<sup>b</sup>

School of Chemistry, Dalian University of Technology, No.2 Linggong Road, Dalian City, Liaoning Province, P. R. China, 116024

<sup>b</sup>Dalian Kaiteli Catalytic Engineering Technology Co. Ltd., No.19 Huangpu Road, Dalian City, Liaoning Province, P. R. China, 116024

**Table S1. Comparison of XGBoost Model Performance in Retaining and Removing Outliers.**

|                 | Test_R <sup>2</sup> | Test_RMSE | Test_MAE |
|-----------------|---------------------|-----------|----------|
| Retain Outliers | 0.85                | 0.45      | 0.27     |
| Remove outliers | 0.92                | 0.31      | 0.21     |

Table S2. Features selected for formation energy prediction model.

|                    | Name                                                 | Symbol                                                | Unit              |  |
|--------------------|------------------------------------------------------|-------------------------------------------------------|-------------------|--|
| Target variables   | Formation energy                                     | $E_f$                                                 | eV                |  |
|                    | Atomic number                                        | $Z_a, Z_b$                                            |                   |  |
|                    | Atomic radius                                        | $r_a, r_b, \Delta r$                                  | pm                |  |
|                    | Work function                                        | $W_a, W_b, \Delta W$                                  | eV                |  |
|                    | Ionization energy                                    | $IE_a, IE_b, \Delta IE$                               | MJ/mol            |  |
|                    | Electronegativity                                    | $\chi_a, \chi_b, \Delta \chi$                         |                   |  |
|                    | Electron affinity                                    | $EA_a, EA_b, \Delta EA$                               | eV                |  |
|                    | Number of valence electrons                          | $VE_a, VE_b, \Delta VE$                               |                   |  |
| Element Properties | Period                                               | $Period_a, Period_b$                                  |                   |  |
|                    | d-band filling of the host metal                     | $f$                                                   |                   |  |
|                    | d-band center of the host metal                      | $\epsilon_d$                                          | eV                |  |
|                    | Mass                                                 | $M_a, M_b, \Delta M$                                  |                   |  |
|                    | Density                                              | $\rho_a, \rho_b, \Delta \rho$                         | g/cm <sup>3</sup> |  |
|                    | Specific heat capacity                               | $C_{p_a}, C_{p_b}, \Delta C_p$                        | J/Kg*K            |  |
|                    | Cohesion energy                                      | $CE_{bulk_a}, CE_{bulk_b}, \Delta CE_{bulk}$          | eV                |  |
|                    | Cohesive energy/coordination number of a single atom | $CE_{bulk_a}/CN, CE_{bulk_b}/CN, \Delta CE_{bulk}/CN$ | eV                |  |
|                    | Structural characteristics                           | Coordination number of a single atom                  | CN                |  |
|                    |                                                      | Miller index                                          | MI                |  |

|                                              |                                                                   |   |
|----------------------------------------------|-------------------------------------------------------------------|---|
| Bond length between dopant<br>and host metal | $l_1, l_2, \Delta l_1, \Delta l_2$                                | Å |
| Lattice constant                             | $a_a, a_b, b_a, b_b, c_a, c_b,$<br>$\Delta a, \Delta b, \Delta c$ | Å |

'a' denotes the host metal and 'b' denotes the dopant atom.

Table S3. The cohesive energy of 46 kinds of metals.

| Atom | CEbulk (eV/mol) | Atom | CEbulk (eV/mol) |
|------|-----------------|------|-----------------|
| Sc   | -4.53           | Os   | -9.05           |
| Ti   | -6.09           | Ir   | -8.30           |
| V    | -5.82           | Pt   | -6.30           |
| Cr   | -9.87           | Au   | -3.65           |
| Mn   | -3.90           | Be   | -3.70           |
| Fe   | -5.35           | Mg   | -1.73           |
| Co   | -5.76           | Ca   | -2.06           |
| Ni   | -5.52           | Sr   | -1.76           |
| Cu   | -3.97           | Ba   | -2.01           |
| Zn   | -1.42           | B    | -6.49           |
| Y    | -4.63           | Al   | -3.66           |
| Zr   | -7.03           | Ga   | -2.85           |
| Nb   | -7.57           | In   | -2.53           |
| Mo   | -8.06           | Tl   | -2.24           |
| Ru   | -8.55           | Si   | -4.71           |
| Rh   | -6.63           | Ge   | -3.86           |
| Pd   | -4.35           | Sn   | -3.30           |
| Ag   | -2.99           | Pb   | -3.11           |
| Cd   | -1.04           | As   | -3.24           |
| Hf   | -7.00           | Sb   | -2.99           |
| Ta   | -8.96           | Bi   | -2.86           |
| W    | -9.45           | Se   | -2.87           |
| Re   | -8.38           | Te   | -2.70           |

**Table S4. R<sup>2</sup> and MAE for each ML algorithm with optimal hyperparameters.**

| ML algorithm      | CV<br>MAE<br>(eV) | CV<br>R <sup>2</sup> | Train<br>MAE<br>(eV) | Train<br>R <sup>2</sup> | Test<br>MAE<br>(eV) | Test<br>R <sup>2</sup> | Tuned hyperparameter<br>value                                                                                                                  |
|-------------------|-------------------|----------------------|----------------------|-------------------------|---------------------|------------------------|------------------------------------------------------------------------------------------------------------------------------------------------|
| Linear regression | 0.58              | 0.53                 | 0.56                 | 0.58                    | 0.54                | 0.57                   | Non-parametric                                                                                                                                 |
| Ridge regression  | 0.57              | 0.53                 | 0.55                 | 0.57                    | 0.54                | 0.57                   | alpha=1.0                                                                                                                                      |
| Lasso             | 0.58              | 0.53                 | 0.56                 | 0.58                    | 0.54                | 0.57                   | alpha=0.0001                                                                                                                                   |
| ElasticNet        | 0.58              | 0.53                 | 0.56                 | 0.58                    | 0.54                | 0.57                   | alpha=0.0001326,<br>l1_ratio=0.4,<br>max_iter=5000                                                                                             |
| Kneighbors        | 0.38              | 0.74                 | 0                    | 1                       | 0.32                | 0.83                   | algorithm='auto',<br>n_neighbors=5, p=1,<br>weights='distance'                                                                                 |
| Decision Tree     | 0.48              | 0.57                 | 0                    | 1                       | 0.41                | 0.73                   | max_depth=None,<br>min_samples_split=2                                                                                                         |
| Support vector    | 0.22              | 0.88                 | 0.08                 | 0.95                    | 0.20                | 0.91                   | C=10.0, epsilon=0.01,<br>gamma='auto',<br>kernel='rbf'                                                                                         |
| RandomForest      | 0.33              | 0.80                 | 0.12                 | 0.97                    | 0.26                | 0.88                   | n_estimators=100,<br>max_depth=none,<br>min_samples_split=2                                                                                    |
| GradiebtBoosting  | 0.27              | 0.85                 | 0.0024               | 1                       | 0.23                | 0.91                   | learning_rate=0.1,<br>max_depth=7,<br>max_features='sqrt',<br>min_samples_leaf=1,<br>min_samples_split=5,<br>n_estimators=300                  |
| ExtraTree         | 0.27              | 0.85                 | 0                    | 1                       | 0.20                | 0.93                   | n_estimators=100,<br>max_depth=None,<br>min_samples_split=2                                                                                    |
| Adaboost          | 0.474             | 0.67                 | 0.42                 | 0.76                    | 0.45                | 0.73                   | learning_rate=1.0,<br>loss='square',<br>n_estimators=200                                                                                       |
| XGBoost           | 0.27              | 0.85                 | 0.02                 | 0.99                    | 0.21                | 0.92                   | colsample_bytree=0.8,<br>gamma=0,<br>learning_rate=0.1,<br>max_depth=5,<br>n_estimators=300,<br>reg_alpha=0,<br>reg_lambda=1,<br>subsample=0.8 |

**Table S5. Performance of the XGBoost Model on Random and Extrapolation Test Sets.**

|                        | Test_R <sup>2</sup> | Test_RMSE | Test_MAE |
|------------------------|---------------------|-----------|----------|
| Random test set        | 0.93                | 0.28      | 0.21     |
| Extrapolation test set | 0.87                | 0.32      | 0.26     |

Table S6. The relationship between  $\Delta\chi$  and  $E_f$  with the similar  $\Delta r$ .

| Number | SAAs               | $E_f$ (eV) | $\Delta\chi$ | $\Delta r$ (pm) |
|--------|--------------------|------------|--------------|-----------------|
| 1      | Rh <sub>1</sub> V  | -1.66      | -0.65        | 0               |
| 2      | Ru <sub>1</sub> V  | -1.16      | -0.57        | 0               |
| 3      | Pd <sub>1</sub> Re | -0.77      | -0.3         | 0               |
| 4      | Nb <sub>1</sub> Ta | -0.27      | -0.1         | 0               |
| 5      | Rh <sub>1</sub> Ru | -0.17      | -0.08        | 0               |
| 6      | V <sub>1</sub> Zn  | 1.25       | 0.02         | 0               |
| 7      | Cr <sub>1</sub> Cu | 0.53       | 0.24         | 0               |
| 8      | Re <sub>1</sub> Pd | 0.14       | 0.3          | 0               |
| 9      | Ga <sub>1</sub> Os | -0.76      | 0.39         | 0               |
| 10     | V <sub>1</sub> Ru  | -1.19      | 0.57         | 0               |
| 11     | Zn <sub>1</sub> Rh | -1.43      | 0.63         | 0               |
| 12     | V <sub>1</sub> Rh  | -1.48      | 0.65         | 0               |

Table S7. With the similar  $\Delta CE_{\text{bulk}}$  and  $\Delta\chi$ , the relationship between  $\Delta r$  and  $E_f$ .

| Number | SAAs               | $E_f$ (eV) | $\Delta CE_{\text{bulk}}$ (eV) | $\Delta\chi$ | $\Delta r$ (pm) |
|--------|--------------------|------------|--------------------------------|--------------|-----------------|
| 1      | Bi <sub>1</sub> W  | -2.09      | -9.34                          | -0.2         | -15.7           |
| 2      | Sn <sub>1</sub> W  | -1.65      | -9.53                          | -0.26        | -12             |
| 3      | Te <sub>1</sub> Re | -1.27      | -9.59                          | -0.2         | -5              |
| 4      | Cu <sub>1</sub> W  | 0.39       | -9.35                          | -0.2         | 11              |
| 5      | Sb <sub>1</sub> Ta | -1.88      | -7.98                          | -0.55        | 1               |
| 6      | Te <sub>1</sub> Nb | -1.80      | -7.37                          | -0.5         | 4               |
| 7      | Ge <sub>1</sub> Ta | -1.42      | -7.72                          | -0.51        | 18              |
| 8      | Ga <sub>1</sub> Hf | -1.40      | -7.24                          | -0.51        | 24              |
| 9      | Be <sub>1</sub> Mo | -0.22      | -7.40                          | 0.59         | 27.7            |

Table S8. Features selection for  $\Delta E_{CO}$  prediction model.

|                                             | Name                    | Symbol                                                       | Unit                        |
|---------------------------------------------|-------------------------|--------------------------------------------------------------|-----------------------------|
| Target variable                             | CO adsorption energy    | $\Delta E_{CO}$                                              | eV                          |
|                                             | Atomic number           | $Z_a, Z_b$                                                   |                             |
|                                             | Atomic radius           | $r_a, r_b, \Delta r$                                         | pm                          |
|                                             | Work function           | $W_a, W_b, \Delta W$                                         | eV                          |
|                                             | Ionization energy       | $IE_a, IE_b, \Delta IE$                                      | $MJ \cdot mol^{-1}$         |
|                                             | Electronegativity       | $\chi_a, \chi_b, \Delta \chi$                                |                             |
|                                             | Electron affinity       | $EA_a, EA_b, \Delta EA$                                      | eV                          |
|                                             | Valence electron number | $VE_a, VE_b, \Delta VE$                                      |                             |
|                                             | Period                  | $Period_a, Period_b$                                         |                             |
|                                             | Element Properties      | The d-band filling of the main metal                         | f                           |
| The center of the d-band of the main metal  |                         | $\epsilon_d$                                                 | eV                          |
| Mass                                        |                         | $M_a, M_b, \Delta M$                                         |                             |
| Density                                     |                         | $\rho_a, \rho_b, \Delta \rho$                                | $g \cdot cm^{-3}$           |
| Specific heat capacity                      |                         | $C_{p_a}, C_{p_b}, \Delta C_p$                               | $J \cdot (Kg \cdot K)^{-1}$ |
| Cohesive energy                             |                         | $CE_{bulk_a}, CE_{bulk_b}, \Delta CE_{bulk}$                 | eV                          |
| Surface energy of the host metal            |                         | $E_{surf}$                                                   | eV                          |
| Coordination number of a single atom        |                         | CN                                                           |                             |
| Miller indices                              |                         | MI                                                           |                             |
| The bond length between C and a single atom |                         | $l_{C-N}$                                                    | Å                           |
| Structural characteristics                  | C-O bond length         | $l_{C-O}$                                                    | Å                           |
|                                             | Lattice constant        | $a_a, a_b, b_a, b_b, c_a, c_b, \Delta a, \Delta b, \Delta c$ | Å                           |

‘a’ denotes the host metal and ‘b’ denotes the dopant atom.

**Table S9. Optimized Model Hyperparameters and Performance on Cross-Validation, Training and Test Sets.**

| ML algorithm      | CV MAE (eV) | CV R <sup>2</sup> | Train MAE (eV) | Train R <sup>2</sup> | Test MAE (eV) | Test R <sup>2</sup> | Hyperparameter value                                                                                           |
|-------------------|-------------|-------------------|----------------|----------------------|---------------|---------------------|----------------------------------------------------------------------------------------------------------------|
| Linear regression | 0.32        | -7.52             | 0.20           | 0.85                 | 0.26          | 0.73                | Non-parametric                                                                                                 |
| Ridge regression  | 0.33        | -0.85             | 0.28           | 0.74                 | 0.29          | 0.74                | alpha=100                                                                                                      |
| Lasso             | 0.45        | 0.32              | 0.44           | 0.44                 | 0.45          | 0.43                | alpha=0.27,<br>max_iter=1000,<br>selection='random'                                                            |
| ElasticNet        | 0.48        | 0.31              | 0.47           | 0.35                 | 0.50          | 0.34                | alpha=0.36,<br>l1_ratio=0.9                                                                                    |
| Kneighbors        | 0.29        | 0.69              | 0.23           | 0.80                 | 0.30          | 0.68                | algorithm='auto',<br>n_neighbors=5                                                                             |
| Decision Tree     | 0.14        | 0.88              | 0.041          | 0.99                 | 0.18          | 0.77                | max_depth=9,<br>min_samples_split=5                                                                            |
| Support vector    | 0.12        | 0.88              | 0.050          | 0.95                 | 0.088         | 0.98                | C=1000, epsilon=0.01,<br>gamma=0.001,<br>kernel='rbf'                                                          |
| RandomForest      | 0.12        | 0.90              | 0.044          | 0.99                 | 0.088         | 0.97                | max_features=0.5,<br>n_estimators=300<br>learning_rate=0.05,<br>max_depth=3,                                   |
| Gradient Boosting | 0.14        | 0.90              | 0.06           | 0.98                 | 0.11          | 0.96                | max_features='sqrt',<br>n_estimators=300,<br>min_samples_leaf=5,<br>min_samples_split=10                       |
| ExtraTree         | 0.12        | 0.92              | 0.03           | 0.99                 | 0.09          | 0.97                | n_estimators=100,<br>min_samples_split=2,<br>min_samples_leaf=2,<br>min_samples_split=3                        |
| Adaboost          | 0.18        | 0.87              | 0.16           | 0.92                 | 0.20          | 0.86                | learning_rate=1.0,<br>loss='square',<br>n_estimators=200<br>colsample_bytree=0.9,<br>gamma=0,                  |
| XGBoost           | 0.13        | 0.90              | 0.04           | 0.99                 | 0.09          | 0.97                | learning_rate=0.05,<br>max_depth=7,<br>n_estimators=300,<br>reg_alpha=1.0,<br>reg_lambda=2.0,<br>subsample=0.8 |

**Table S10. Ten-fold cross validation results of RFR model.**

| Fold | R <sup>2</sup> | RMSE (eV) | MAE (eV) |
|------|----------------|-----------|----------|
| 1    | 0.94           | 0.18      | 0.10     |
| 2    | 0.94           | 0.19      | 0.12     |
| 3    | 0.93           | 0.19      | 0.12     |
| 4    | 0.91           | 0.20      | 0.12     |
| 5    | 0.97           | 0.11      | 0.09     |
| 6    | 0.97           | 0.12      | 0.09     |
| 7    | 0.96           | 0.15      | 0.09     |
| 8    | 0.93           | 0.18      | 0.11     |
| 9    | 0.95           | 0.18      | 0.11     |
| 10   | 0.97           | 0.13      | 0.10     |
| Mean | 0.95           | 0.16      | 0.11     |
| Std  | 0.02           | 0.03      | 0.01     |

**Table S11. Performance of the RFR Model on Random and Extrapolation Test Sets.**

|                        | Test_R <sup>2</sup> | Test_RMSE | Test_MAE |
|------------------------|---------------------|-----------|----------|
| Random test set        | 0.97                | 0.12      | 0.09     |
| Extrapolation test set | 0.88                | 0.08      | 0.06     |

Table S12. Relationship between  $\Delta E_{CO}$  and CEbulk\_b for Cu-based SAAs.

| Number | SAAs               | $\Delta E_{CO}$ (eV) | CEbulk_b (eV) | l <sub>C-O</sub> (Å) | l <sub>C-N</sub> (Å) |
|--------|--------------------|----------------------|---------------|----------------------|----------------------|
| 1      | Rh <sub>1</sub> Cu | -2.18                | -6.63         | 1.17                 | 1.85                 |
| 2      | Pt <sub>1</sub> Cu | -1.65                | -6.30         | 1.16                 | 1.87                 |
| 3      | Ti <sub>1</sub> Cu | -1.40                | -6.09         | 1.16                 | 2.10                 |
| 4      | Sc <sub>1</sub> Cu | -0.88                | -4.53         | 1.15                 | 2.33                 |
| 5      | Al <sub>1</sub> Cu | -0.67                | -3.66         | 1.16                 | 1.99                 |
| 6      | Ag <sub>1</sub> Cu | -0.46                | -2.99         | 1.15                 | 2.11                 |
| 7      | Zn <sub>1</sub> Cu | -0.41                | -1.42         | 1.15                 | 2.02                 |

**Table S13. Threshold sensitivity analysis of  $\Delta E_{CO}$  with fixed  $\Delta E_H$  screening ( $\Delta E_H \notin [-0.47, -0.07]$  eV).**

| $\Delta E_{CO}$ range (eV) | Candidates | Retention of original 26 |
|----------------------------|------------|--------------------------|
| [-0.77, -0.57]             | 26         | 100%                     |
| [-0.72, -0.62]             | 8          | 31%                      |
| [-0.72, -0.57]             | 17         | 65%                      |
| [-0.77, -0.62]             | 17         | 65%                      |
| [-0.75, -0.59]             | 23         | 88%                      |
| [-0.75, -0.57]             | 23         | 88%                      |
| [-0.77, -0.59]             | 22         | 85%                      |

Table S14. Threshold sensitivity analysis of  $\Delta E_H$  with fixed  $\Delta E_{CO}$  screening ( $\Delta E_{CO} \in [-0.77, -0.57]$  eV).

| $\Delta E_H$ excluded range (eV) | Candidates | Retention of original 26 |
|----------------------------------|------------|--------------------------|
| [-0.47, -0.07]                   | 26         | 100%                     |
| [-0.52, -0.02]                   | 26         | 100%                     |
| [-0.57, 0.03]                    | 26         | 100%                     |
| [-0.62, 0.08]                    | 26         | 100%                     |
| [-0.67, 0.13]                    | 26         | 100%                     |
| [-0.72, 0.18]                    | 26         | 100%                     |
| [-0.77, 0.23]                    | 26         | 100%                     |

Table S15. Gibbs free energy changes for each elementary step of CO<sub>2</sub>RR toward CH<sub>4</sub> on Cu (111).

| Reaction mechanism                         | $\Delta G$ (eV) |
|--------------------------------------------|-----------------|
| $CO_2 + * \rightarrow CO_2^*$              | 0.31            |
| $CO_2^* + H^+ + e^- \rightarrow *COOH$     | 0.46            |
| $*COOH + H^+ + e^- \rightarrow *CO + H_2O$ | -0.48           |
| $*CO + H^+ + e^- \rightarrow *CHO$         | 0.67            |
| $*CHO + H^+ + e^- \rightarrow *OCH_2$      | -0.11           |
| $*OCH_2 + H^+ + e^- \rightarrow *OCH_3$    | -0.79           |
| $*OCH_3 + H^+ + e^- \rightarrow *O + CH_4$ | -0.49           |
| $*O + H^+ + e^- \rightarrow *OH$           | -0.52           |
| $*OH + H^+ + e^- \rightarrow *H_2O$        | -0.04           |

Table S16. Gibbs free energy changes for each elementary step of CO<sub>2</sub>RR toward CH<sub>3</sub>OH on Cu (111).

| Reaction mechanism                         | $\Delta G$ (eV) |
|--------------------------------------------|-----------------|
| $CO_2 + * \rightarrow CO_2^*$              | 0.31            |
| $CO_2^* + H^+ + e^- \rightarrow *COOH$     | 0.46            |
| $*COOH + H^+ + e^- \rightarrow *CO + H_2O$ | -0.48           |
| $*CO + H^+ + e^- \rightarrow *CHO$         | 0.67            |
| $*CHO + H^+ + e^- \rightarrow *OCH_2$      | -0.11           |
| $*OCH_2 + H^+ + e^- \rightarrow *OCH_3$    | -0.79           |
| $*OCH_3 + H^+ + e^- \rightarrow *OHCH_3$   | 0.05            |
| $*OHCH_3 \rightarrow CH_3OH + *$           | 0.05            |

Table S17. Gibbs free energy changes for each elementary step of CO<sub>2</sub>RR toward CH<sub>4</sub> onAl<sub>1</sub>/Cu (111).

| Reaction mechanism                                                    | $\Delta G$ (eV) (top Al) | $\Delta G$ (eV) (top Cu) |
|-----------------------------------------------------------------------|--------------------------|--------------------------|
| CO <sub>2</sub> +*→CO <sub>2</sub> *                                  | 0.43                     |                          |
| CO <sub>2</sub> *+H <sup>+</sup> +e <sup>-</sup> →*COOH               | 0.03                     |                          |
| *COOH+H <sup>+</sup> +e <sup>-</sup> →*CO+H <sub>2</sub> O            | 0.14                     | -0.16                    |
| *CO+H <sup>+</sup> +e <sup>-</sup> →*CHO                              | 0.08                     | 0.39                     |
| *CHO+H <sup>+</sup> +e <sup>-</sup> →*OCH <sub>2</sub>                | -0.32                    |                          |
| *OCH <sub>2</sub> +H <sup>+</sup> +e <sup>-</sup> →*OCH <sub>3</sub>  | -0.76                    |                          |
| *OCH <sub>3</sub> +H <sup>+</sup> +e <sup>-</sup> →*O+CH <sub>4</sub> | -0.78                    |                          |
| *O+H <sup>+</sup> +e <sup>-</sup> →*OH                                | -0.21                    |                          |
| *OH+H <sup>+</sup> +e <sup>-</sup> →*H <sub>2</sub> O                 | 0.28                     |                          |
| *H <sub>2</sub> O→H <sub>2</sub> O+*                                  | 0.10                     |                          |

Table S18. Gibbs free energy changes for each elementary step of CO<sub>2</sub>RR toward CH<sub>3</sub>OH onAl<sub>1</sub>/Cu (111).

| Reaction mechanism                                                    | $\Delta G$ (eV) (top Al) | $\Delta G$ (eV) (top Cu) |
|-----------------------------------------------------------------------|--------------------------|--------------------------|
| CO <sub>2</sub> +*→CO <sub>2</sub> *                                  | 0.43                     |                          |
| CO <sub>2</sub> *+H <sup>+</sup> +e <sup>-</sup> →*COOH               | 0.03                     |                          |
| *COOH+H <sup>+</sup> +e <sup>-</sup> →*CO+H <sub>2</sub> O            | 0.14                     | -0.16                    |
| *CO+H <sup>+</sup> +e <sup>-</sup> →*CHO                              | 0.08                     | 0.39                     |
| *CHO+H <sup>+</sup> +e <sup>-</sup> →*OCH <sub>2</sub>                | -0.32                    |                          |
| *OCH <sub>2</sub> +H <sup>+</sup> +e <sup>-</sup> →*OCH <sub>3</sub>  | -0.76                    |                          |
| *OCH <sub>3</sub> +H <sup>+</sup> +e <sup>-</sup> →*OHCH <sub>3</sub> | 0.35                     |                          |
| *OHCH <sub>3</sub> →CH <sub>3</sub> OH+*                              | 0.21                     |                          |

Table S19. The Gibbs free energy changes for each elementary step of the CO<sub>2</sub>RR towards CH<sub>4</sub> on the Cu (111) and Au<sub>1</sub>/Pd (111).

| Reaction mechanism                                                    | $\Delta G$ (eV) |                           |
|-----------------------------------------------------------------------|-----------------|---------------------------|
|                                                                       | Cu (111)        | Au <sub>1</sub> /Pd (111) |
| CO <sub>2</sub> +*→CO <sub>2</sub> *                                  | 0.31            | 0.31                      |
| CO <sub>2</sub> *+H <sup>+</sup> +e <sup>-</sup> →*COOH               | 0.46            | -0.08                     |
| *COOH+H <sup>+</sup> +e <sup>-</sup> →*CO+H <sub>2</sub> O            | -0.48           | 0.38                      |
| *CO+H <sup>+</sup> +e <sup>-</sup> →*CHO                              | 0.67            | -0.35                     |
| *CHO+H <sup>+</sup> +e <sup>-</sup> →*OCH <sub>2</sub>                | -0.11           | 0.27                      |
| *OCH <sub>2</sub> +H <sup>+</sup> +e <sup>-</sup> →*OCH <sub>3</sub>  | -0.79           | 0.13                      |
| *OCH <sub>3</sub> +H <sup>+</sup> +e <sup>-</sup> →*O+CH <sub>4</sub> | -0.49           | -0.56                     |
| *O+H <sup>+</sup> +e <sup>-</sup> →*OH                                | -0.52           | -0.38                     |
| *OH+H <sup>+</sup> +e <sup>-</sup> →*H <sub>2</sub> O                 | -0.04           | -0.72                     |

Table S20. The Gibbs free energy changes for each elementary step of the CO<sub>2</sub>RR towards CH<sub>3</sub>OH on the Cu (111) and Au<sub>1</sub>/Pd (111).

| Reaction mechanism                                                    | $\Delta G$ (eV) |                           |
|-----------------------------------------------------------------------|-----------------|---------------------------|
|                                                                       | Cu (111)        | Au <sub>1</sub> /Pd (111) |
| CO <sub>2</sub> +*→CO <sub>2</sub> *                                  | 0.31            | 0.31                      |
| CO <sub>2</sub> *+H <sup>+</sup> +e <sup>-</sup> →*COOH               | 0.46            | -0.08                     |
| *COOH+H <sup>+</sup> +e <sup>-</sup> →*CO+H <sub>2</sub> O            | -0.48           | 0.38                      |
| *CO+H <sup>+</sup> +e <sup>-</sup> →*CHO                              | 0.67            | -0.35                     |
| *CHO+H <sup>+</sup> +e <sup>-</sup> →*OCH <sub>2</sub>                | -0.11           | 0.27                      |
| *OCH <sub>2</sub> +H <sup>+</sup> +e <sup>-</sup> →*OCH <sub>3</sub>  | -0.79           | 0.13                      |
| *OCH <sub>3</sub> +H <sup>+</sup> +e <sup>-</sup> →*OHCH <sub>3</sub> | 0.05            | -0.52                     |

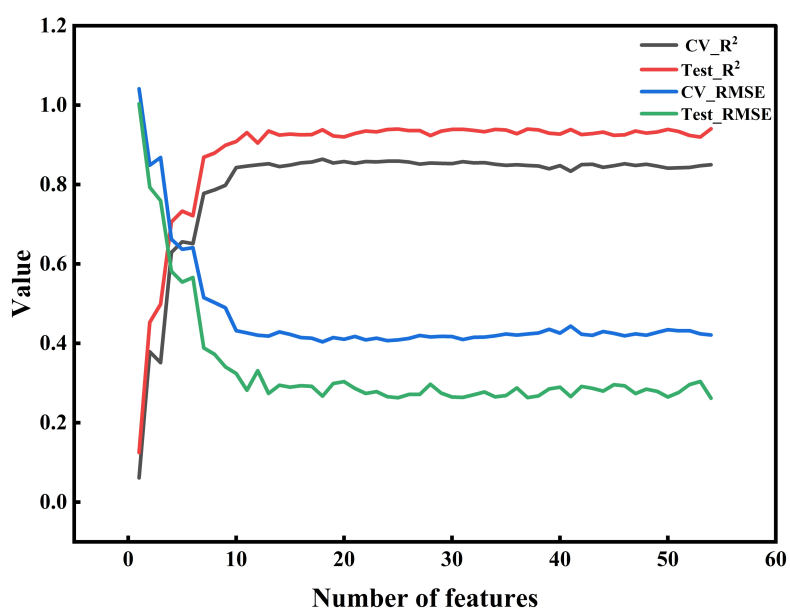

Figure S1. RFE learning curve for XGBoost model.

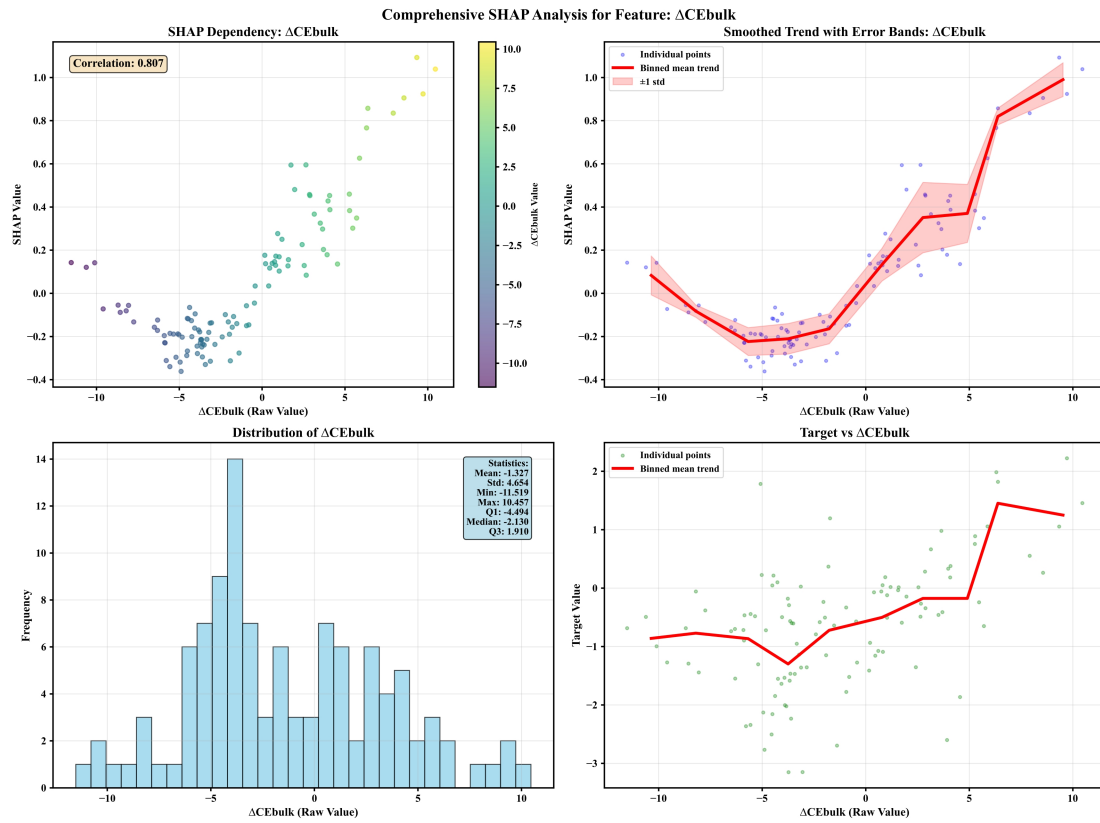

**Figure S2. Comprehensive SHAP analysis for feature  $\Delta$ CEbulk.**

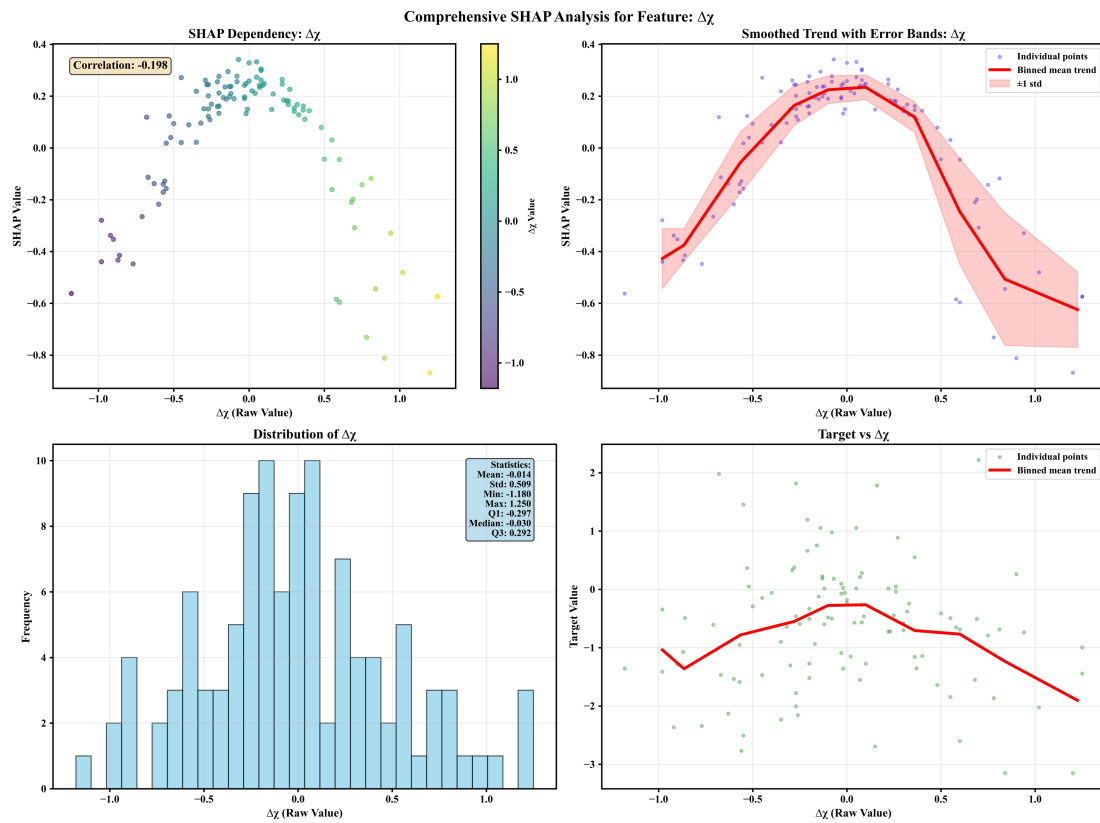

**Figure S3. Comprehensive SHAP analysis for feature  $\Delta$  $\chi$ .**

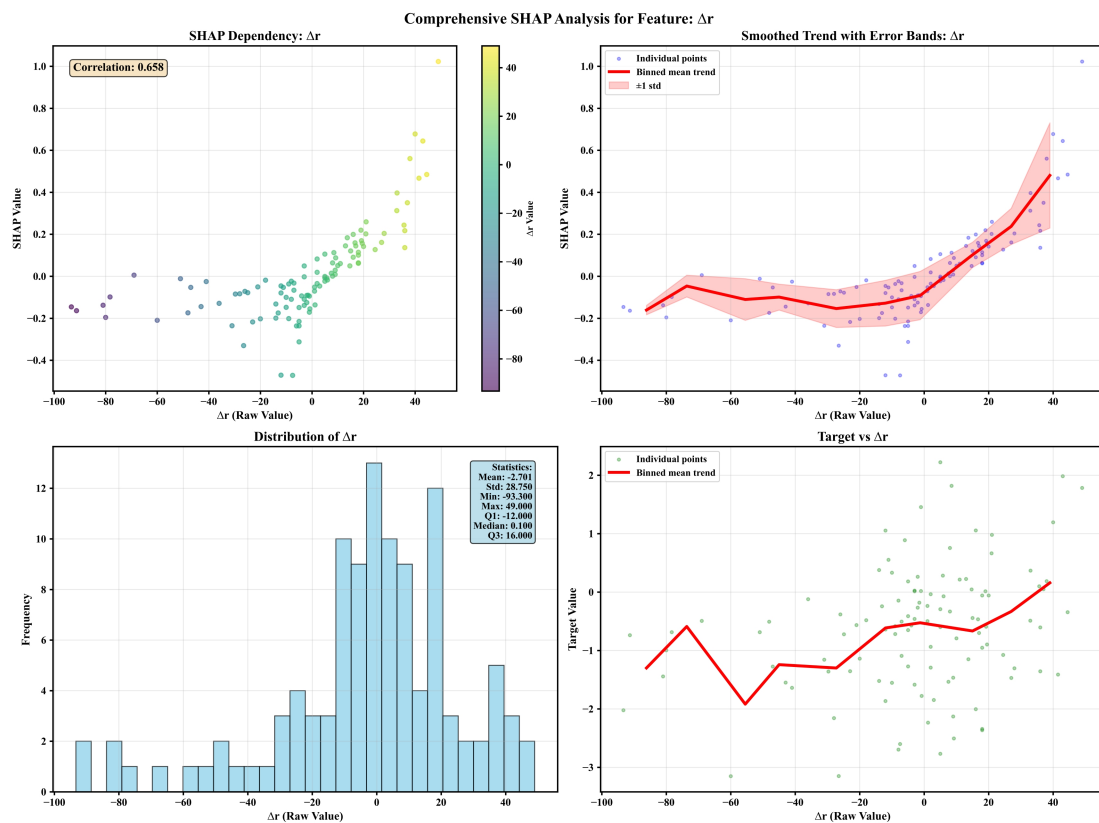

**Figure S4. Comprehensive SHAP analysis for feature  $\Delta r$ .**

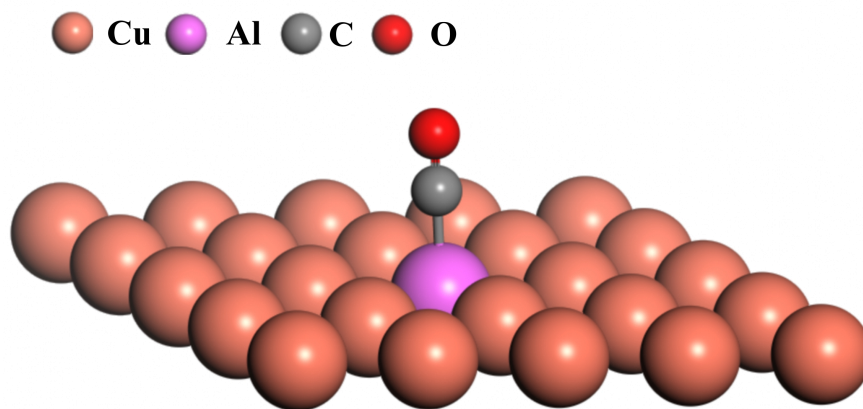

**Figure S5. Schematic diagram of CO adsorption state.**

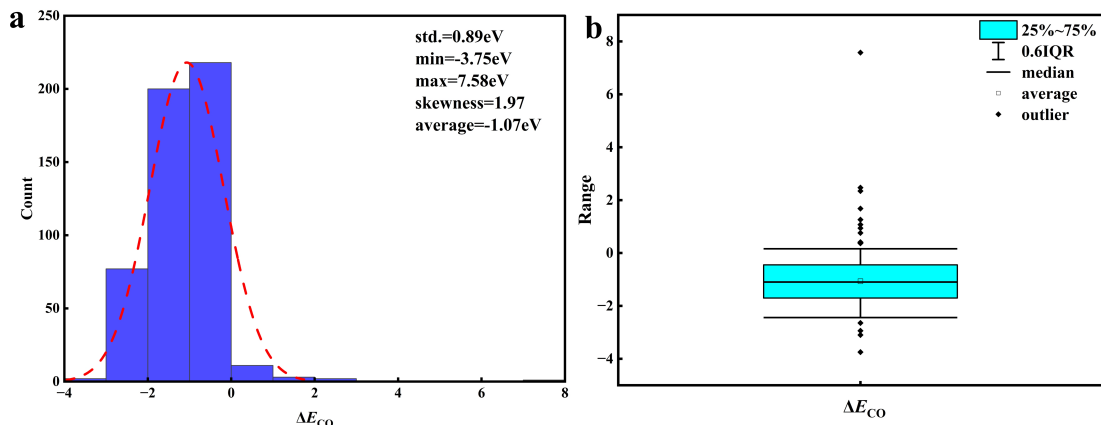

Figure S6. (a) Histogram with the standard deviation of 1.28eV and the average value of -0.64eV. (b) Box plot analysis with the upper bound of 2.27 eV and the lower bound of -3.70 eV.

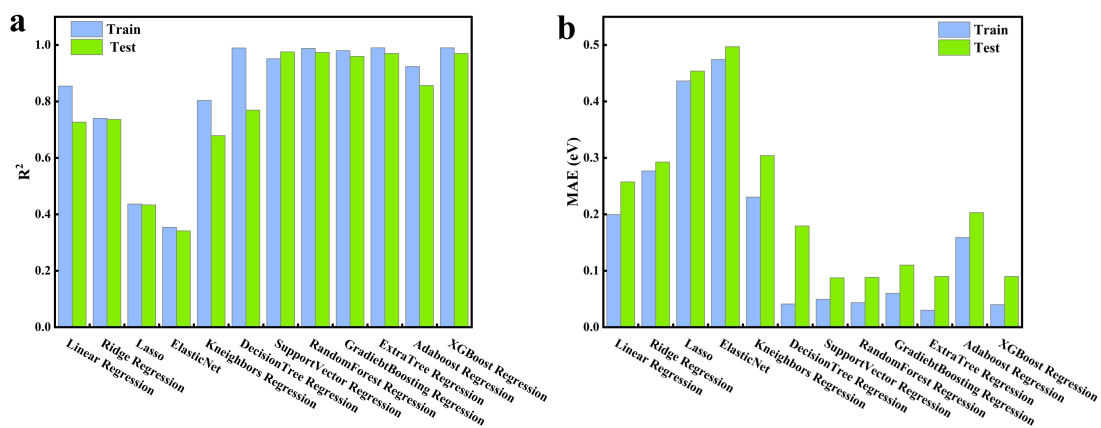

Figure S7. (a)  $R^2$  and (b) MAE (eV) of different machine learning algorithms.

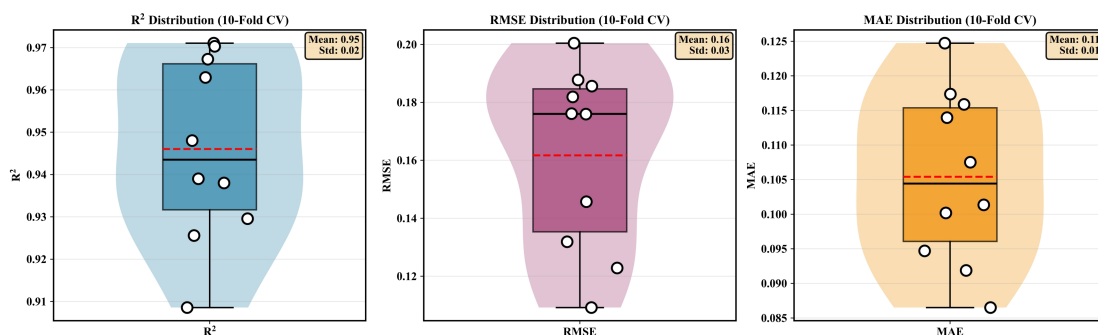

Figure S8. Distribution diagram of RFR model 10-fold cross validation.

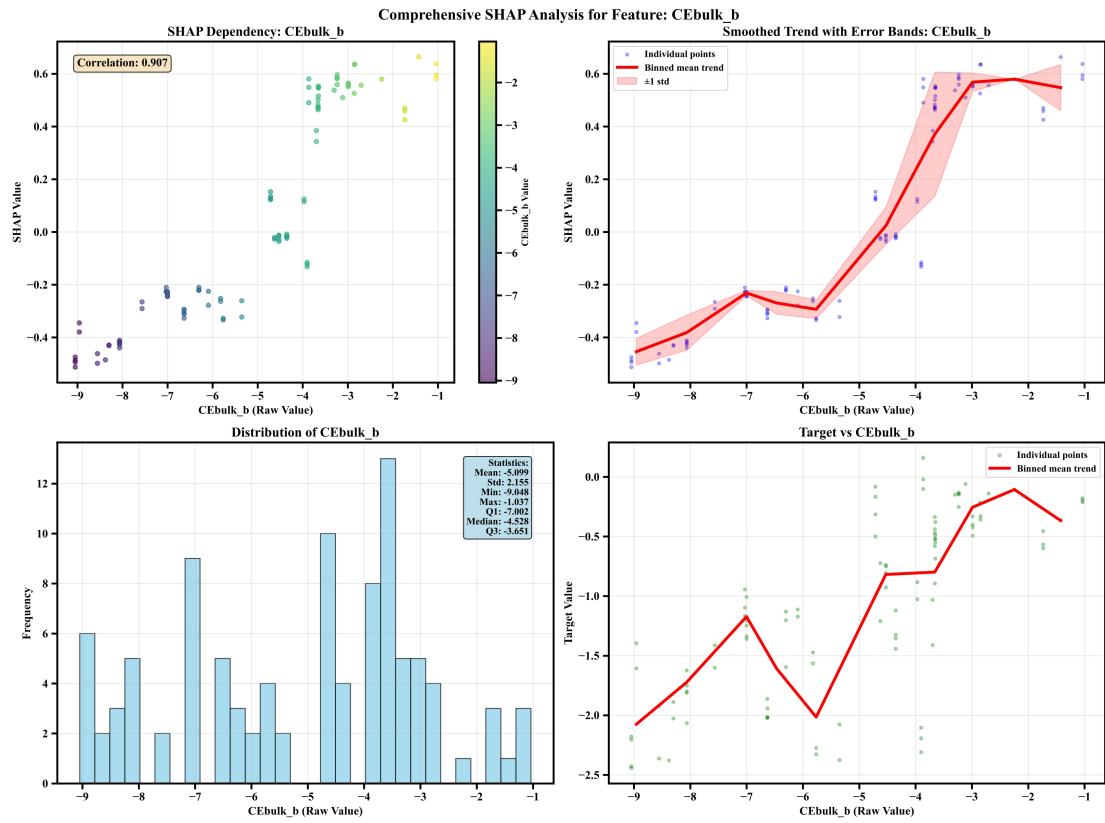

Figure S9. Partial Dependence Plots (PDPs) analysis of CEbulk\_b.

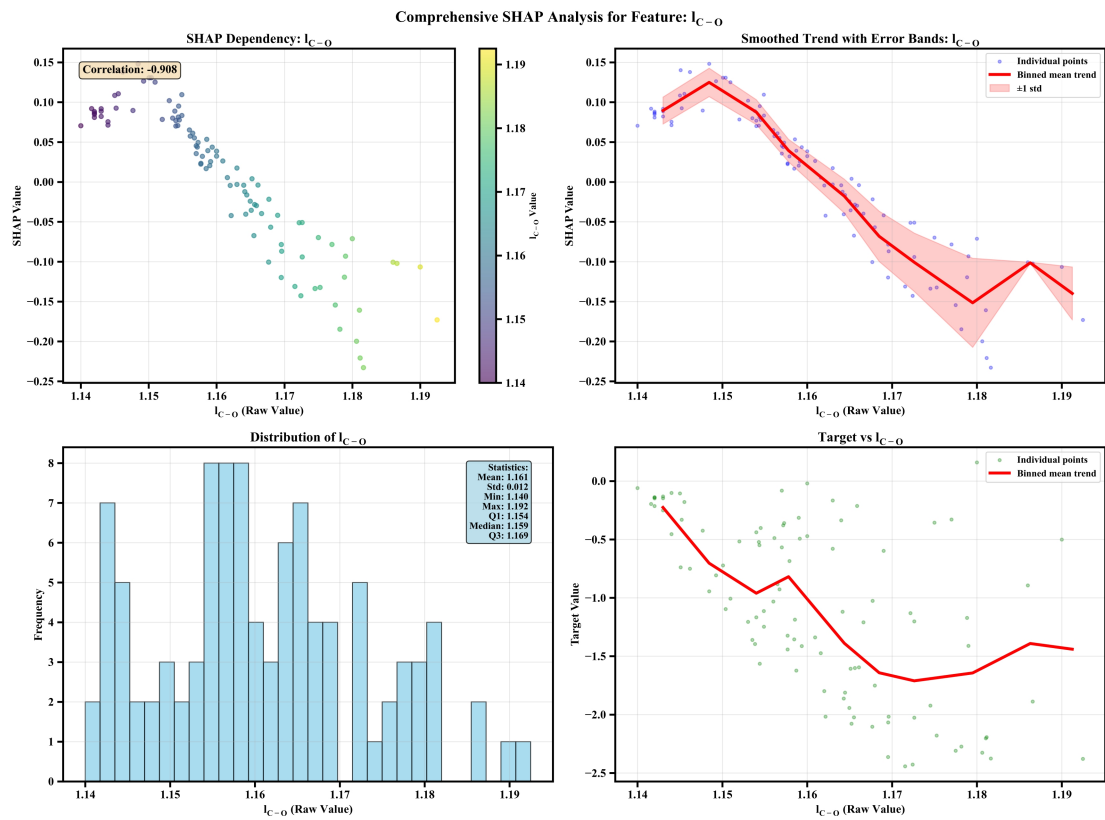

Figure S10. Partial Dependence Plots (PDPs) analysis of I<sub>C-O</sub>.

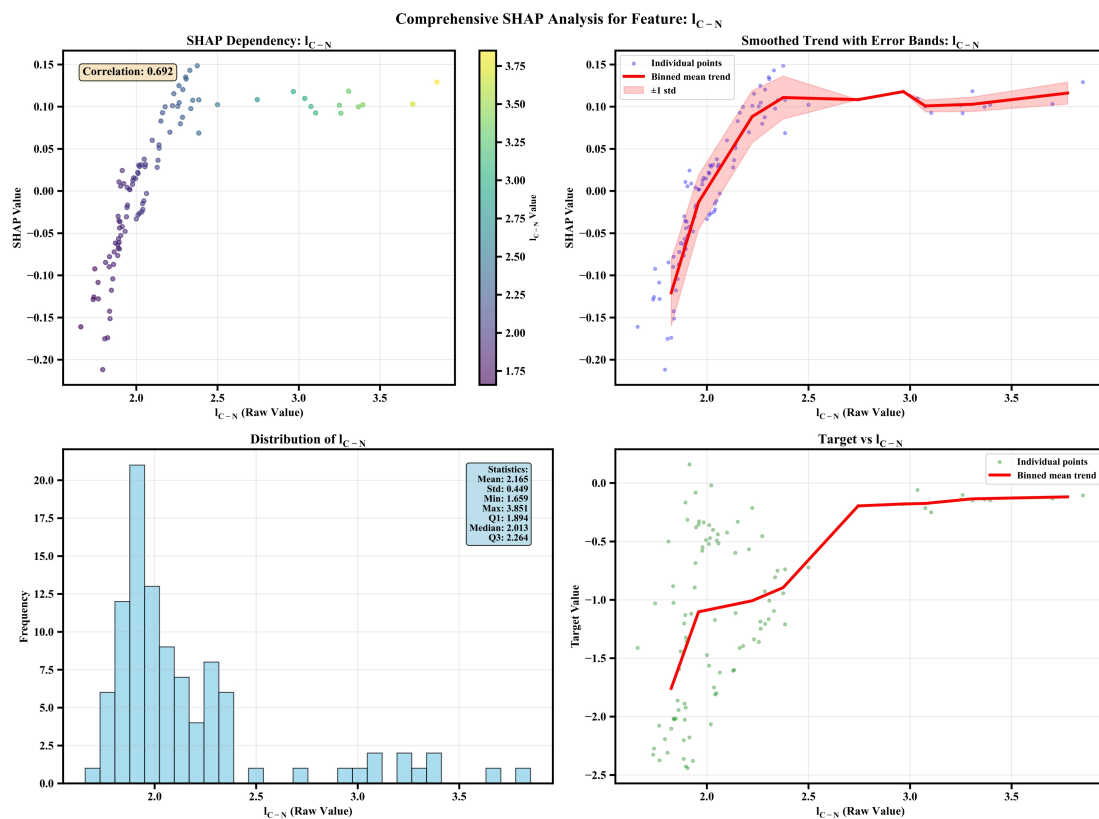

Figure S11. Partial Dependence Plots (PDPs) analysis of  $I_{C-N}$ .

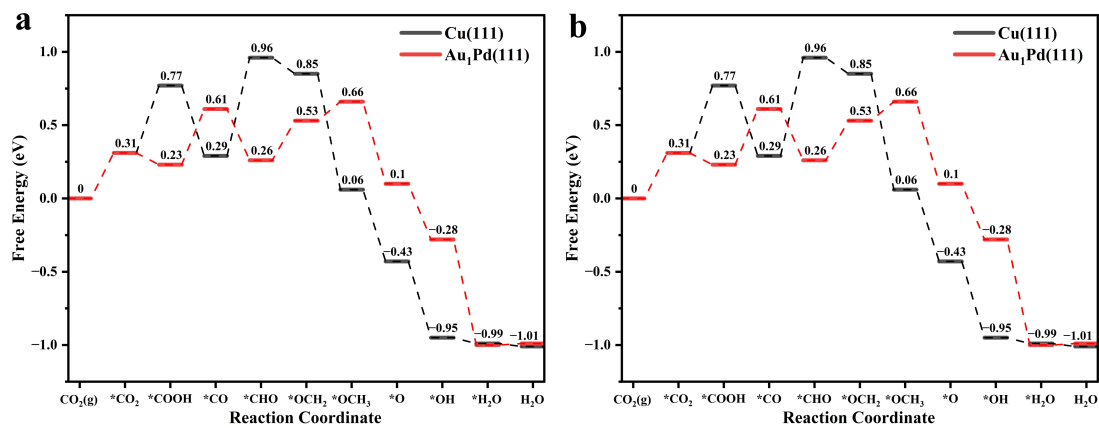

Figure S12. Gibbs Free Energy Diagram for CO<sub>2</sub>RR to CH<sub>4</sub> (a), and to CH<sub>3</sub>OH (b) on Cu(111) and Au<sub>1</sub>Pd(111).
